# Supplementary material for: Synthesis and Anthelmintic Activity of New Thiosemicarbazide Derivatives—A Preliminary Study
Source: PubMed Central journal article supplement (PMC7355614; doi:10.3390/molecules25122770), 2020-06-16
Supplement: molecules-25-02770-s001.pdf [file molecules-25-02770-s001.pdf]

*Supplementary information for*

# **Synthesis and Anthelmintic Activity of New Thiosemicarbazide Derivatives – A Preliminary Study**

**Katarzyna Dziduch <sup>1</sup>, Przemysław Kołodziej <sup>2</sup>, Agata Paneth <sup>1</sup>, Anna Bogucka-Kocka <sup>2</sup> and Monika Wujec <sup>1,\*</sup>,**

<sup>1</sup> Department of Organic Chemistry, Faculty of Pharmacy, Medical University of Lublin, 4A Chodzki Street, 20-093 Lublin, Poland

<sup>2</sup> Chair and Department of Biology and Genetics, Faculty of Pharmacy, Medical University of Lublin, 4A Chodzki Street, 20-093 Lublin, Poland

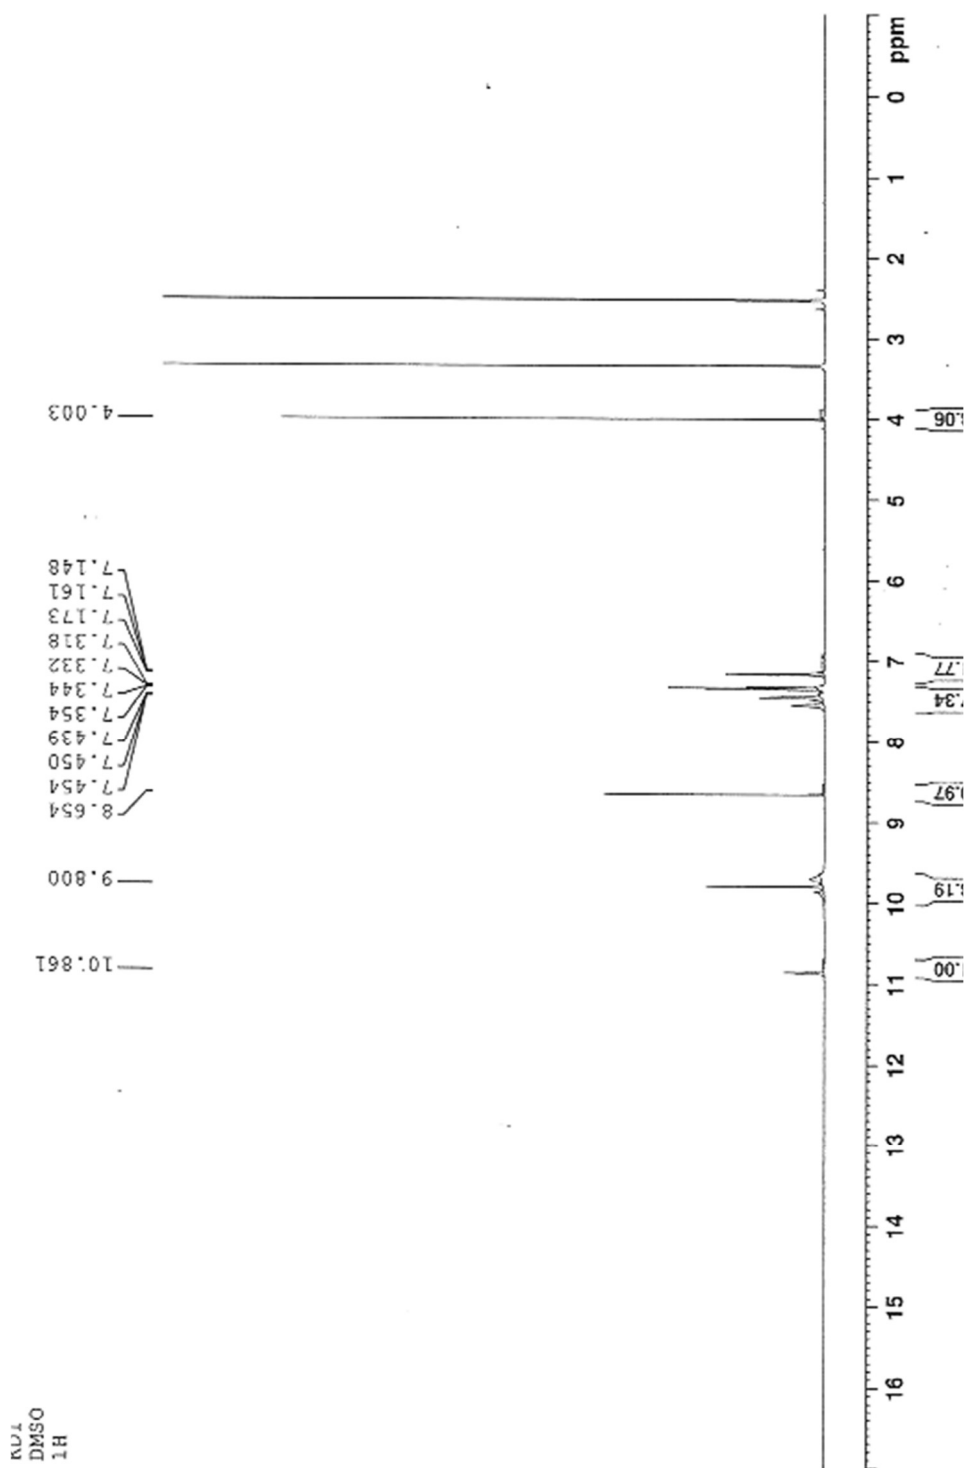

Compound 1.

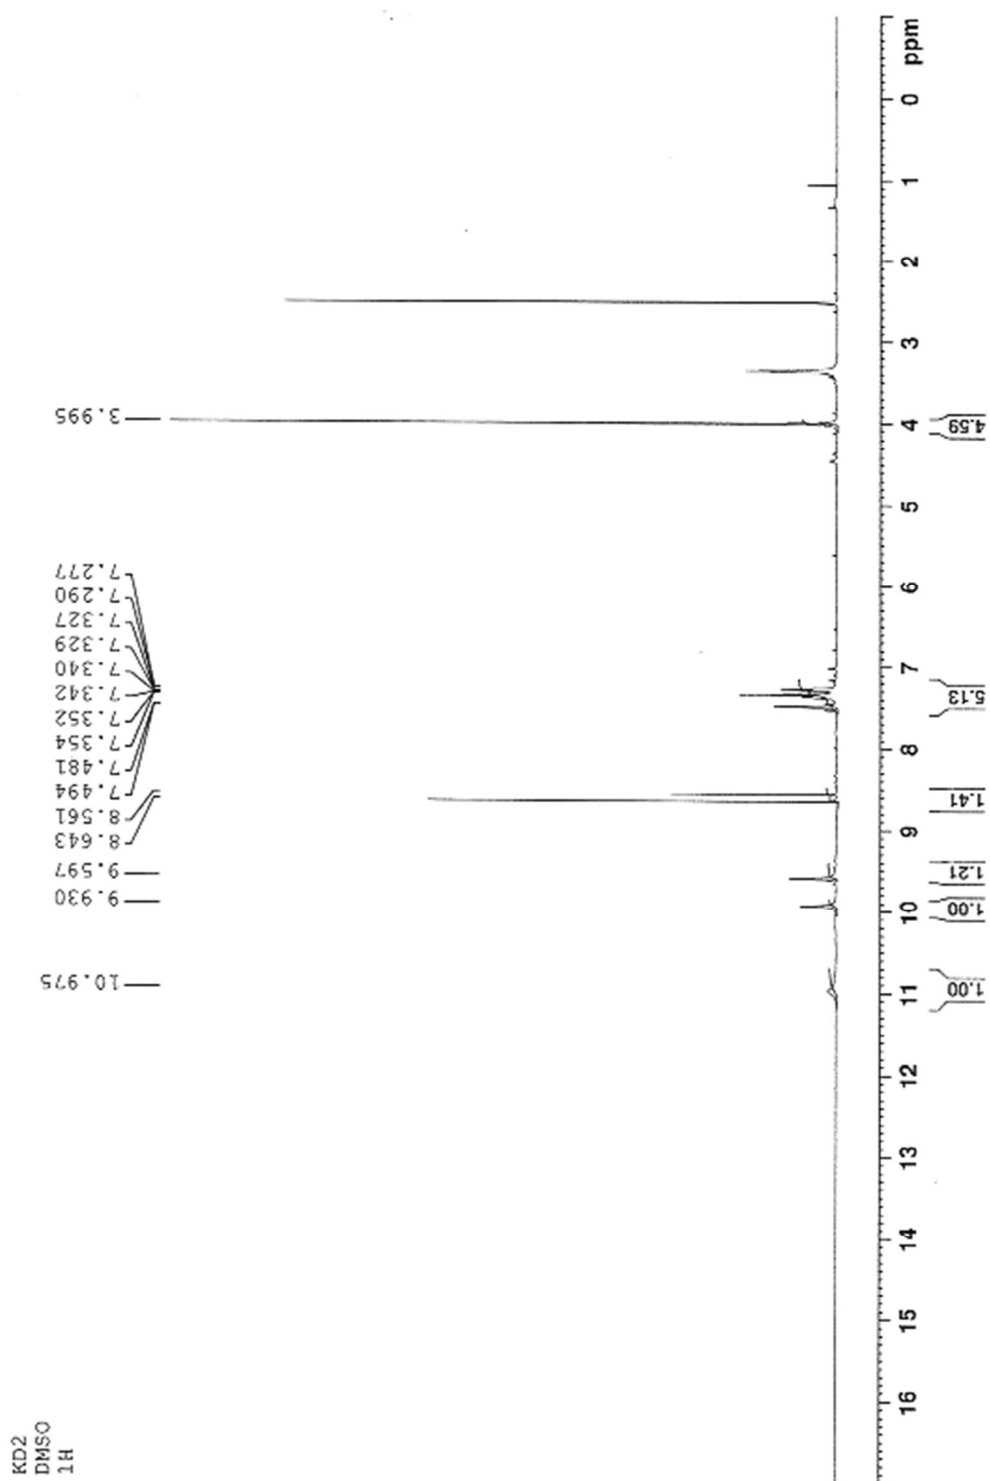

Compound 2.

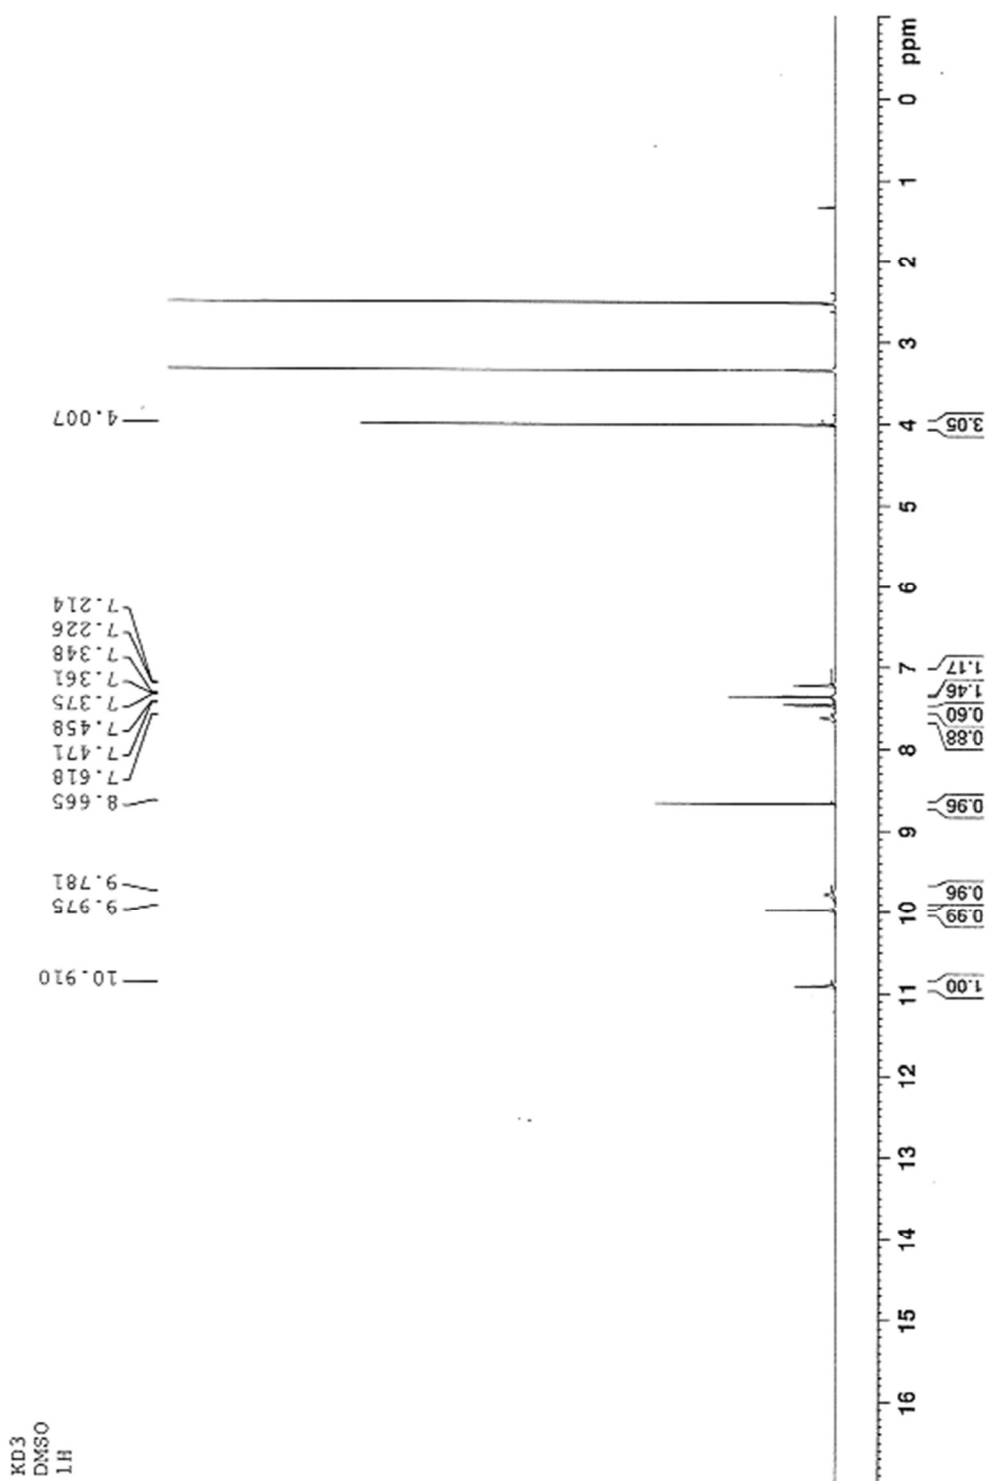

Compound 3.

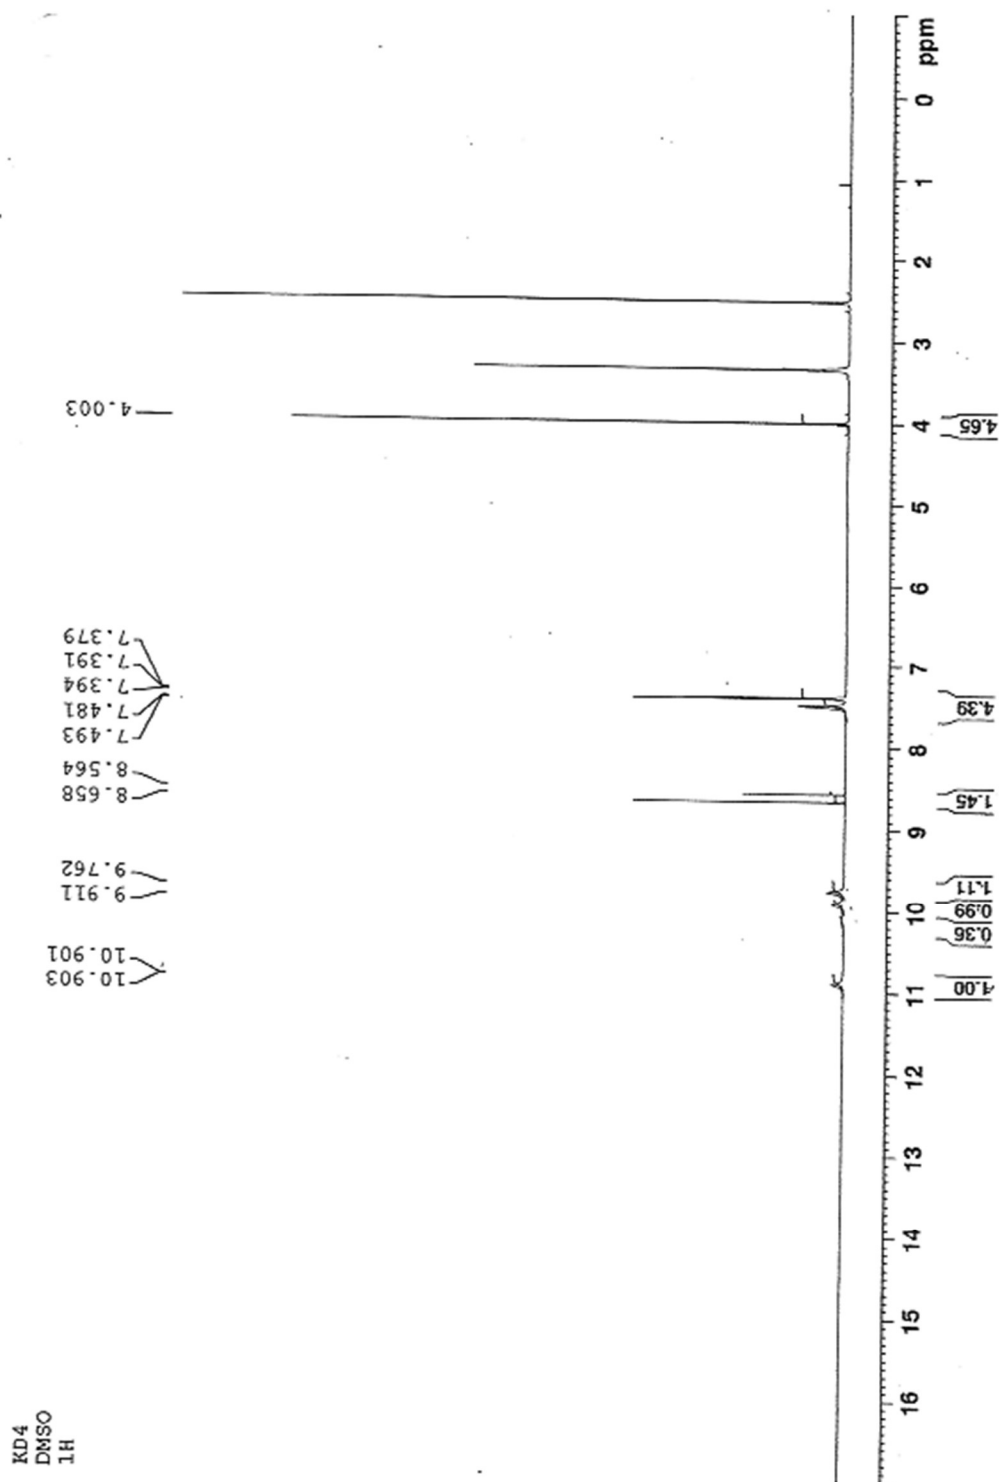

Compound 4.

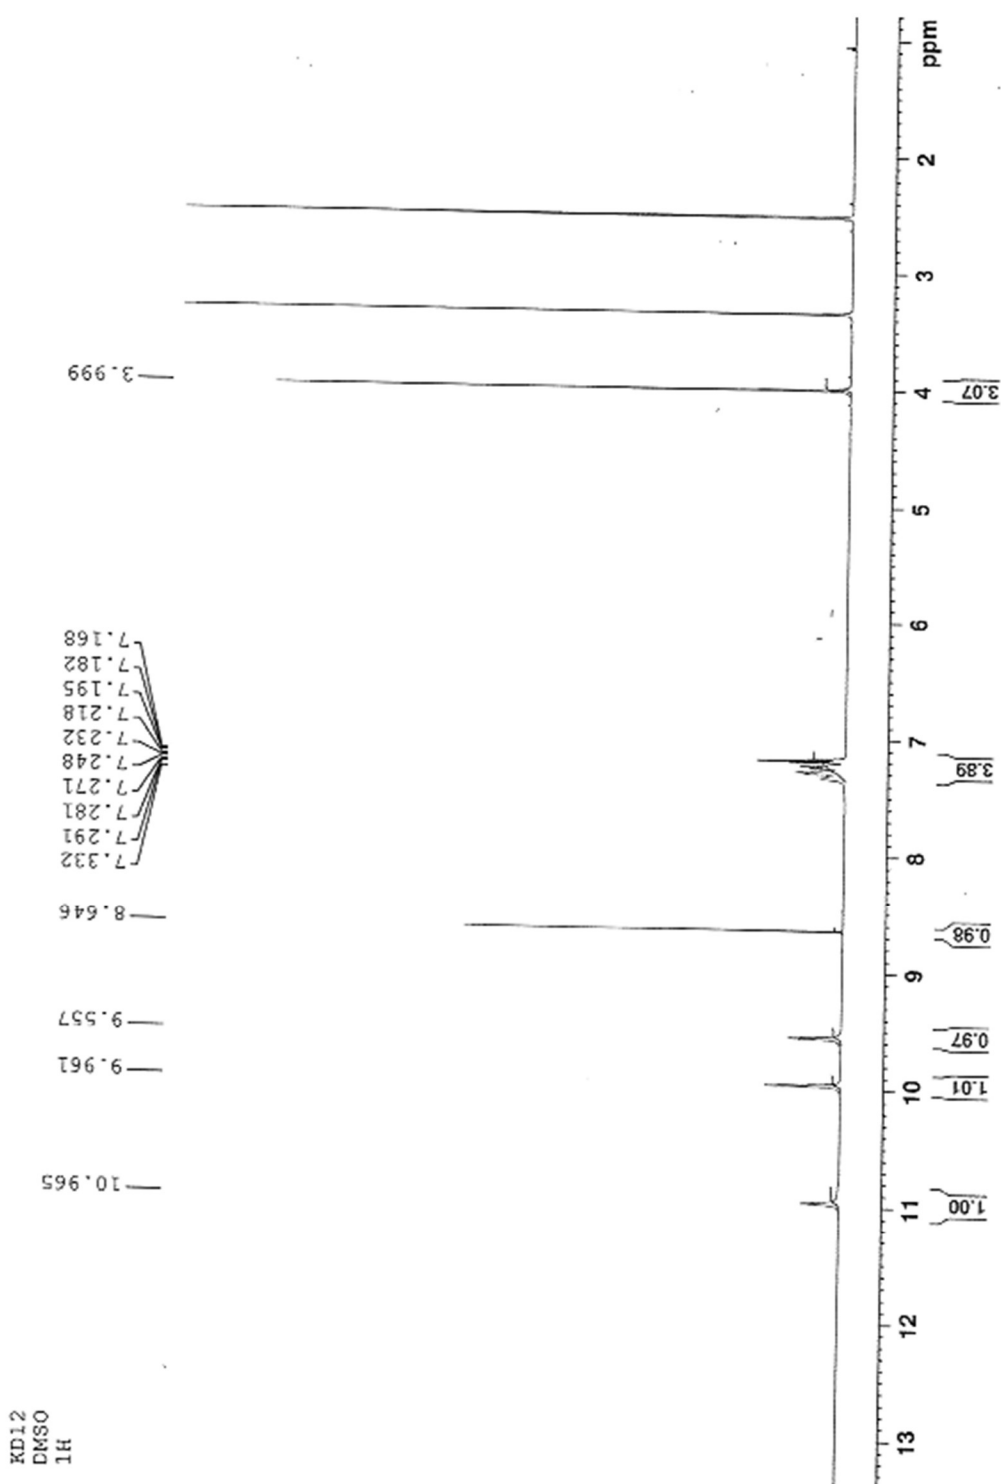

Compound 5.

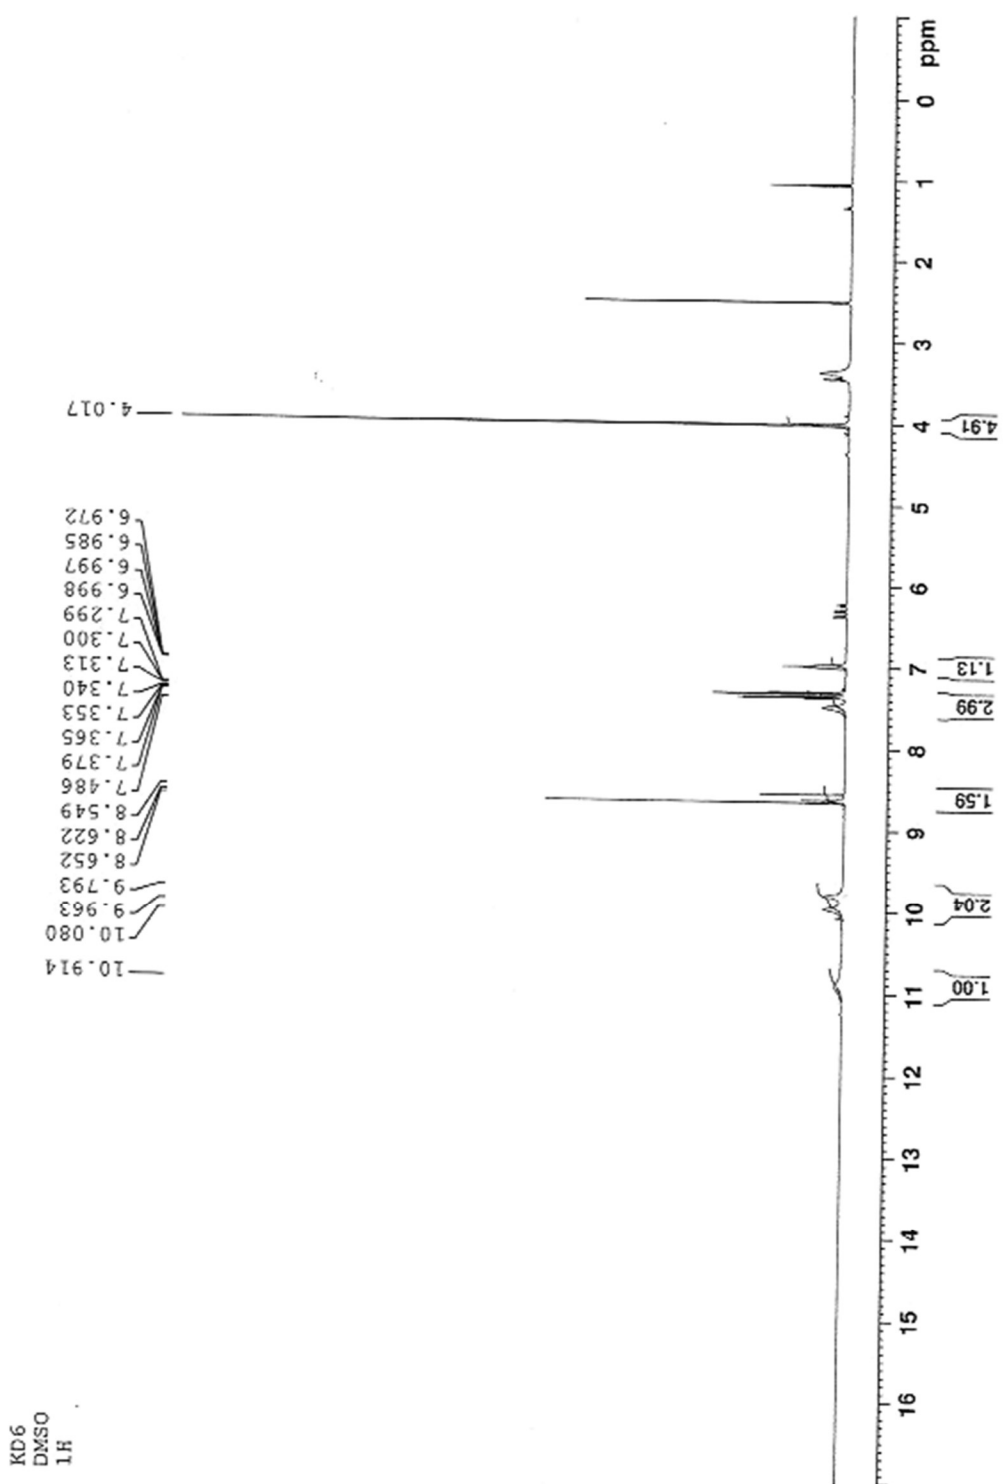

Compound 6.

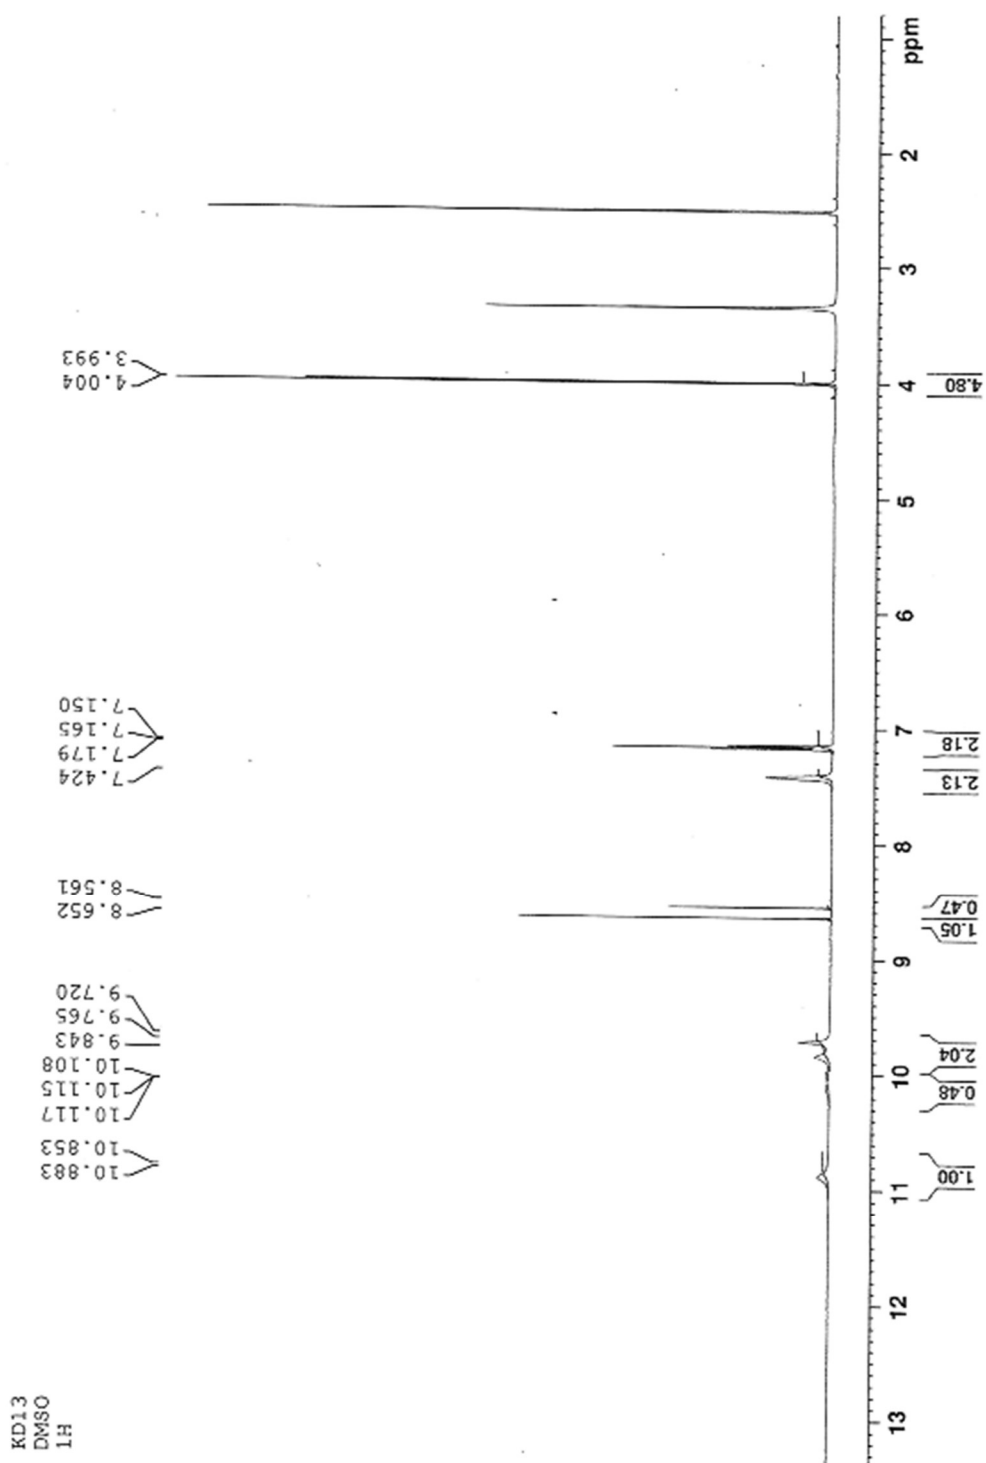

Compound 7.



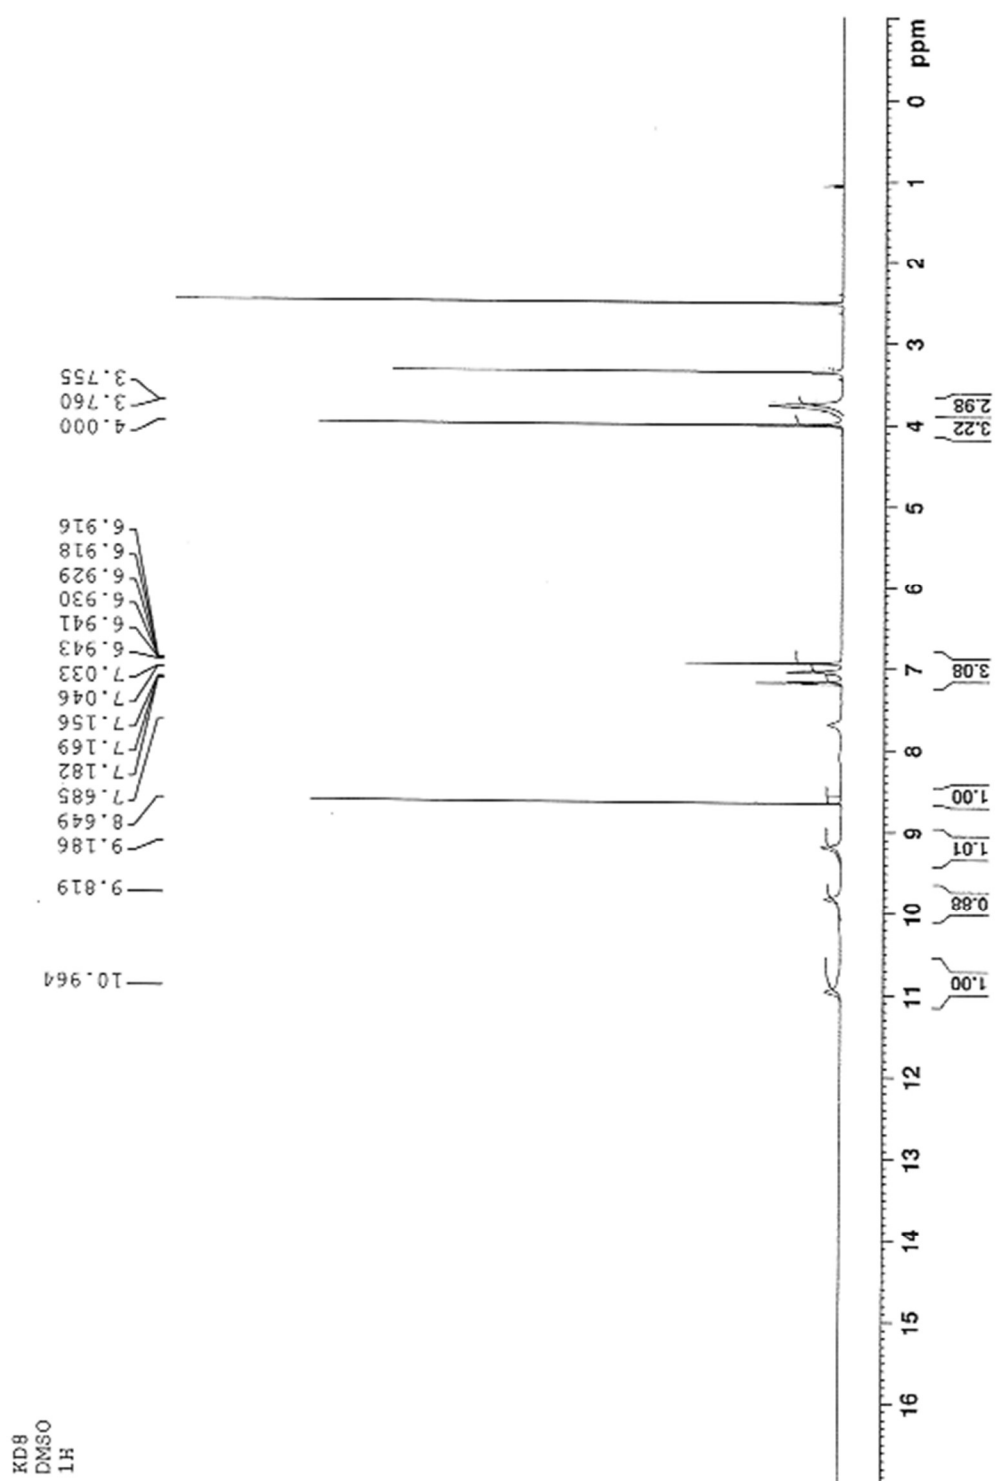

Compound 8.

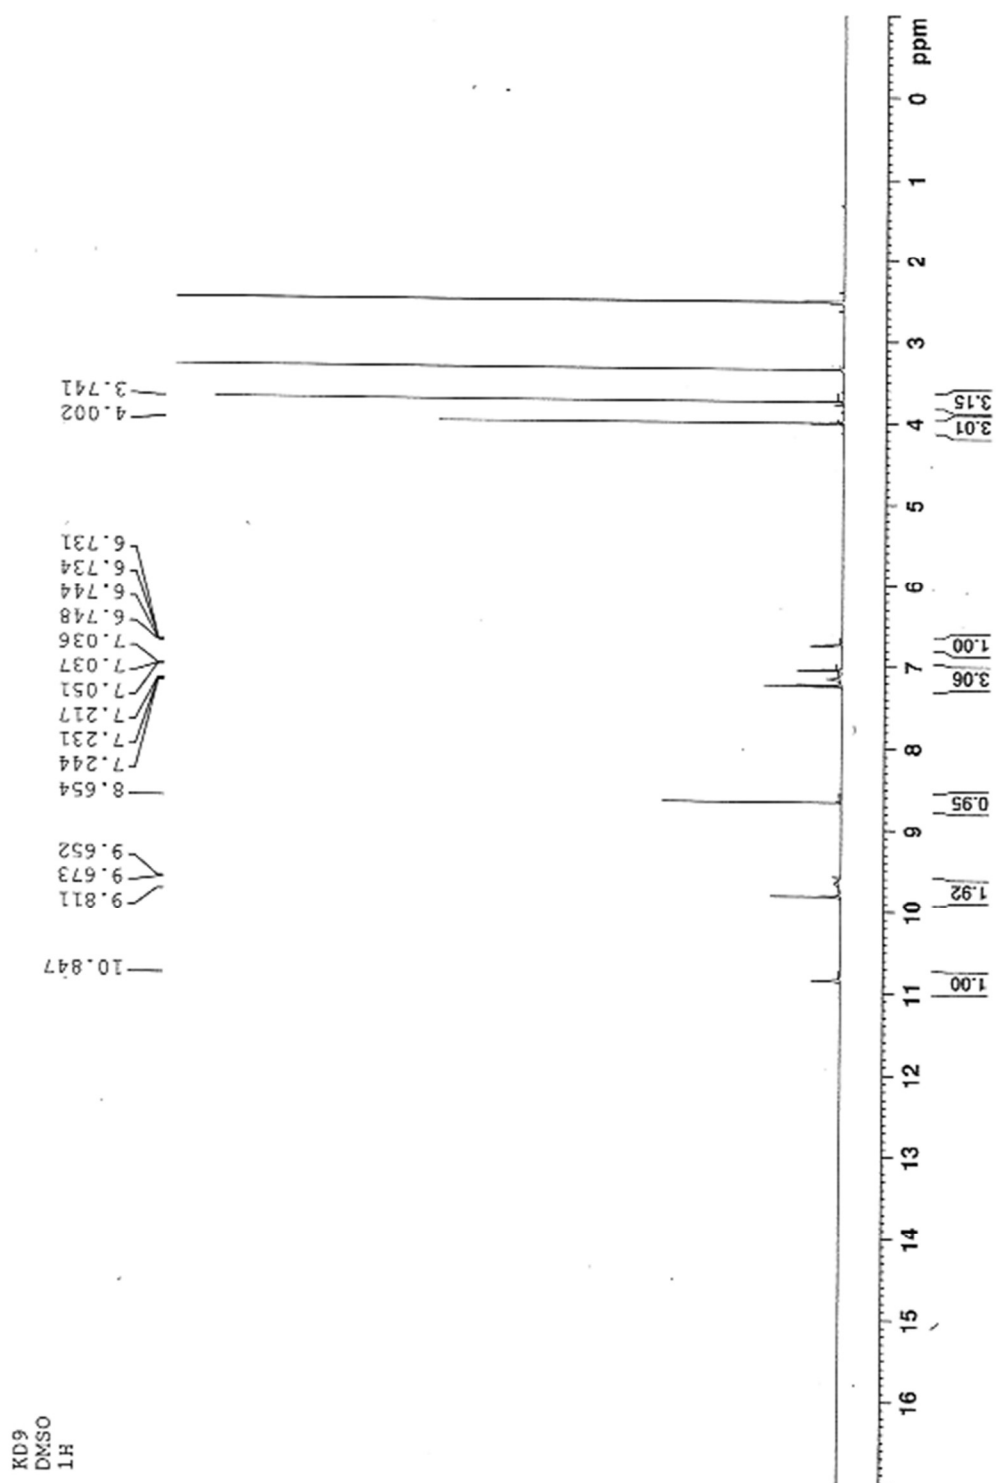

Compound 9.

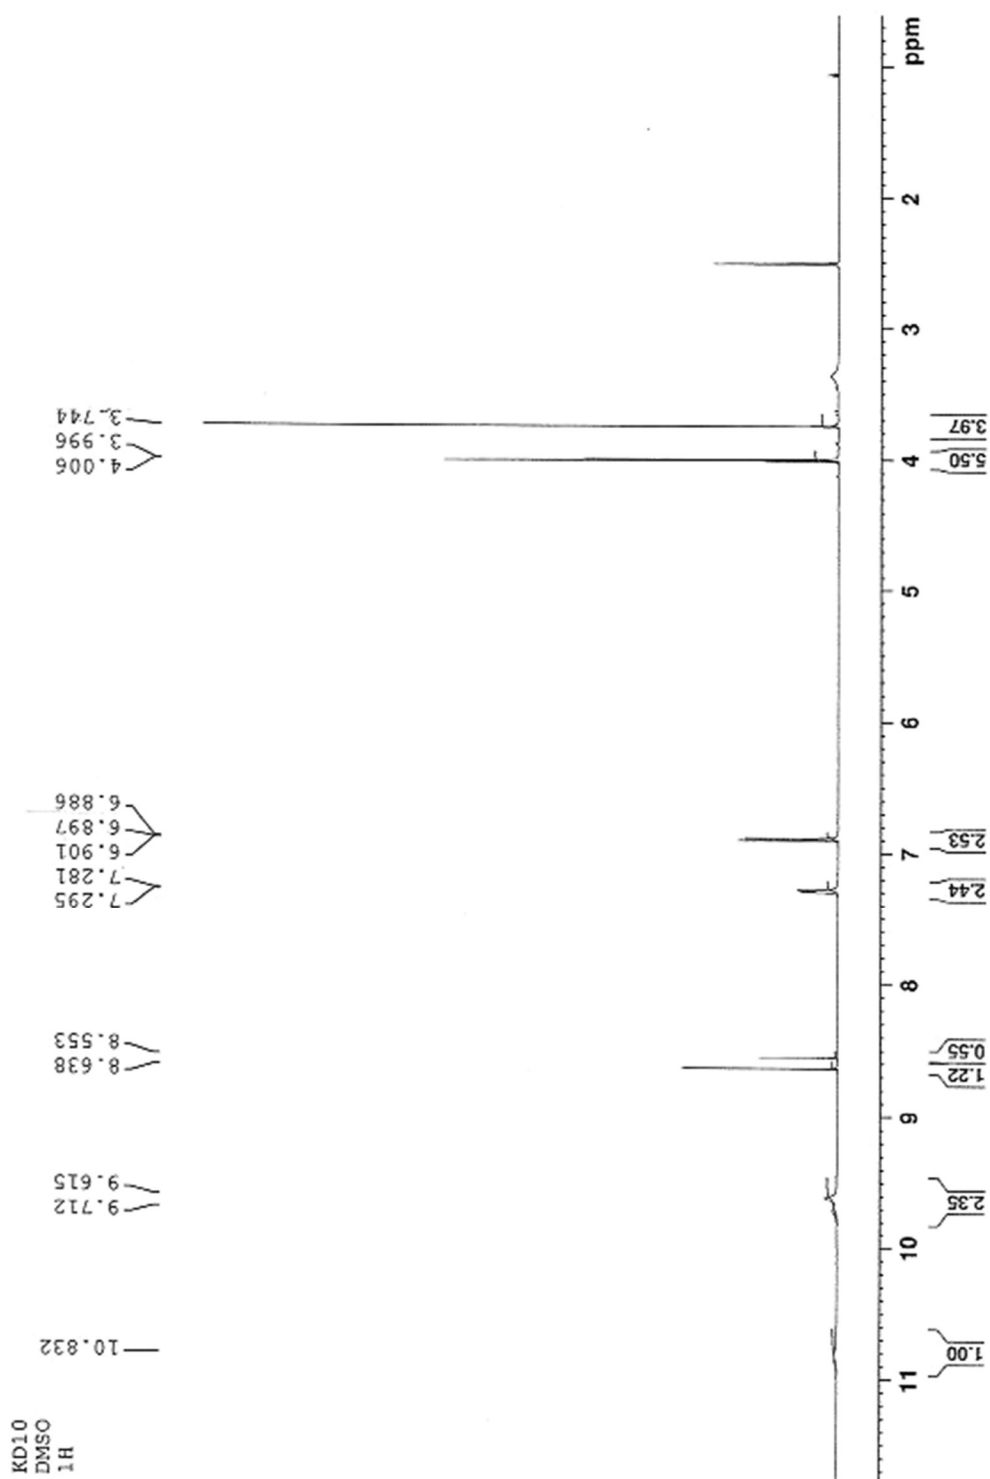

Compound 10.

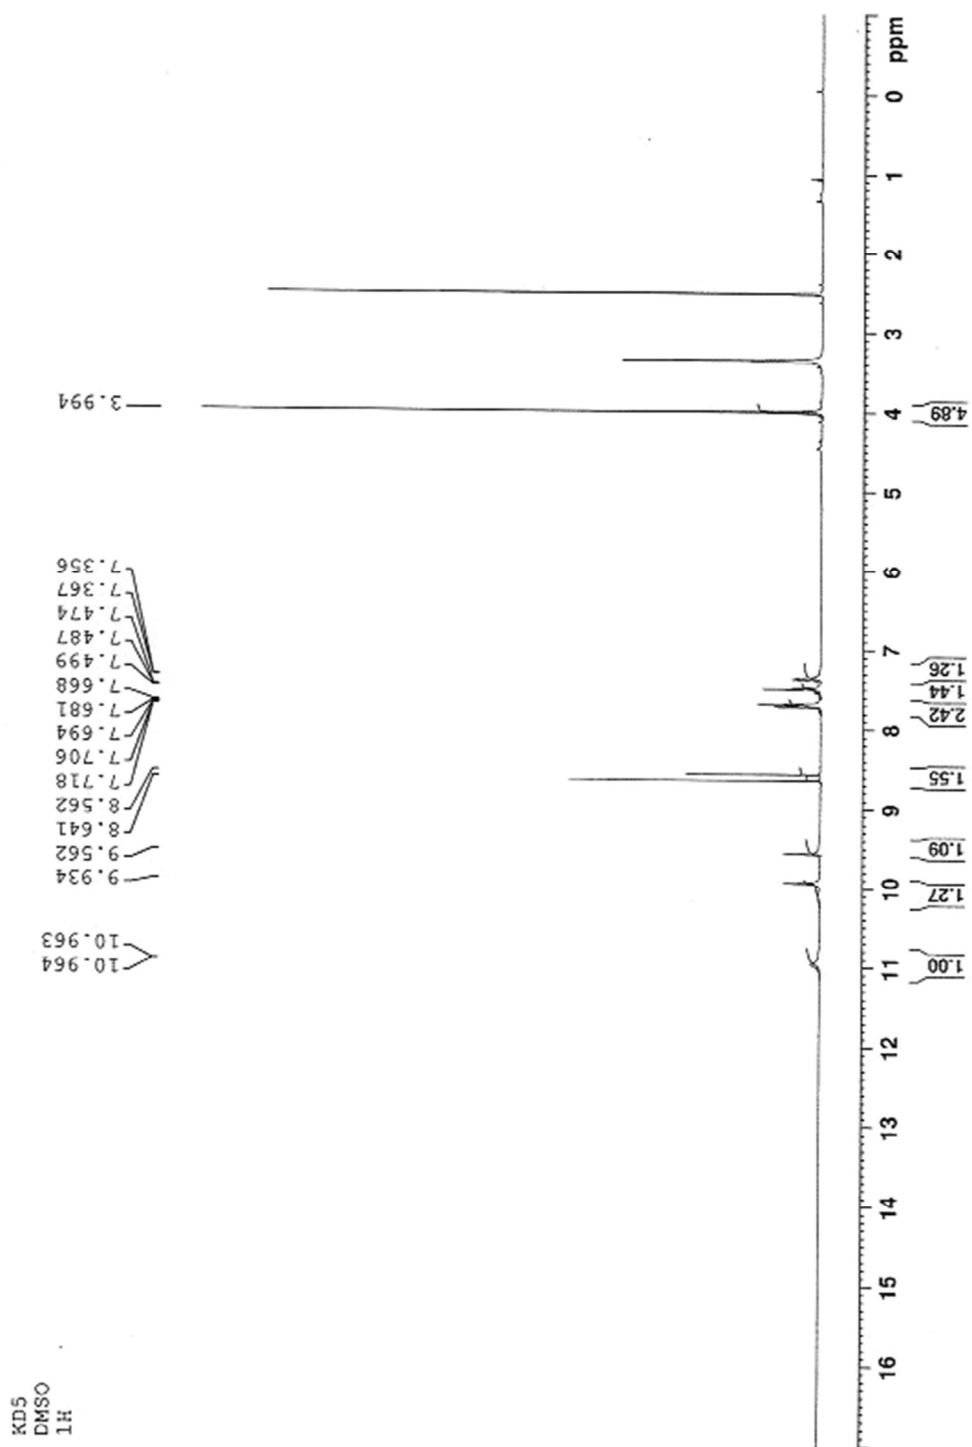

Compound 11.

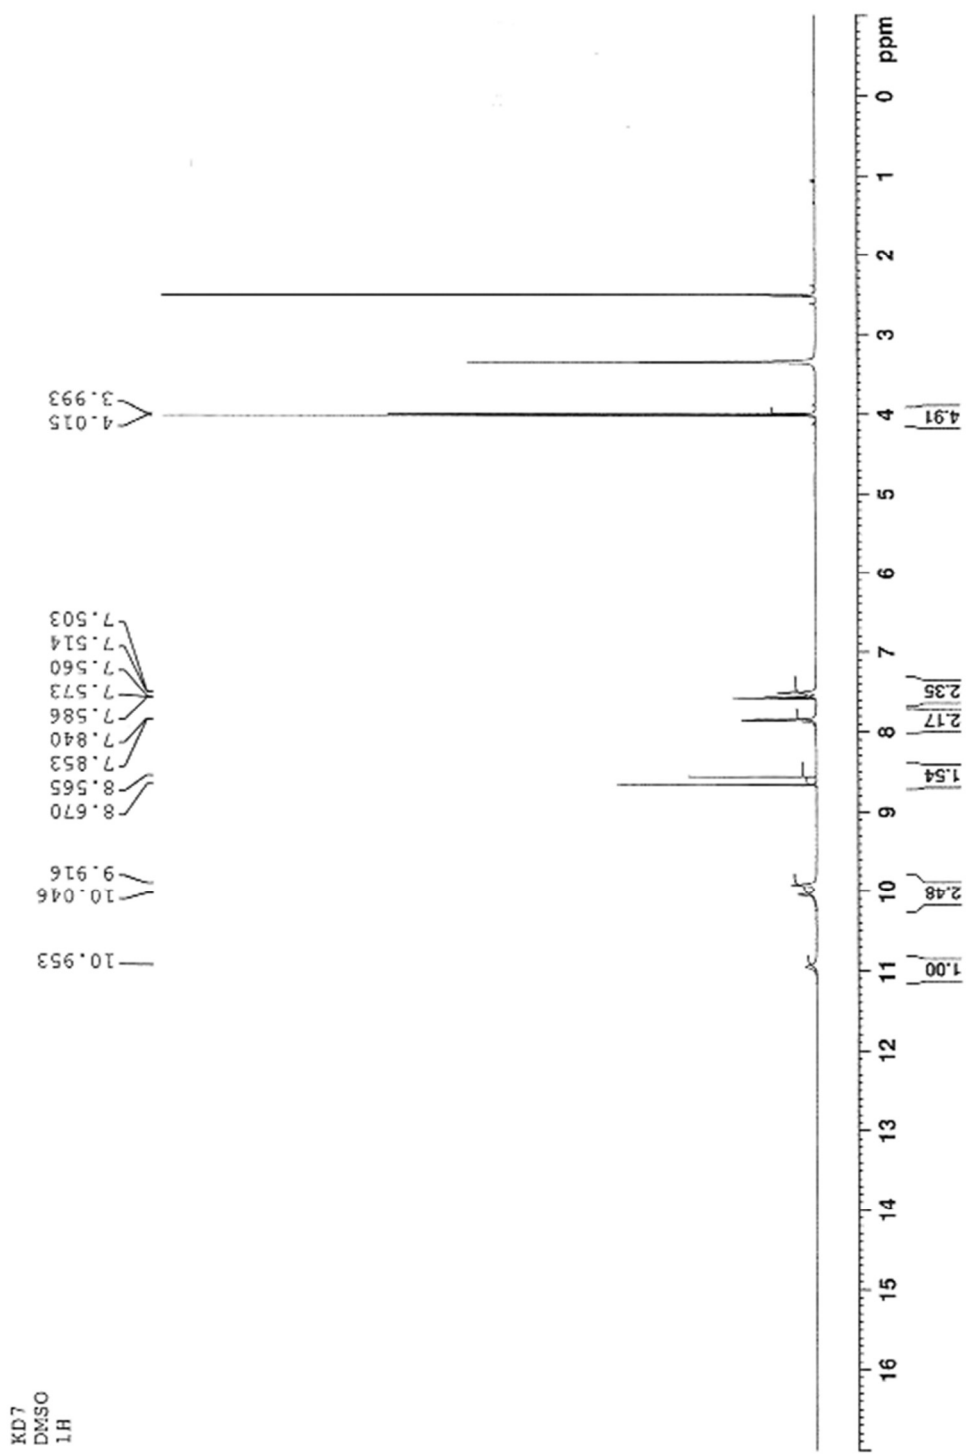

Compound 12.
